# Supplementary material
Source: MDPI journal article supplement (https://www.mdpi.com/2073-4395/9/8/468)
Supplement: s1 [file s1]

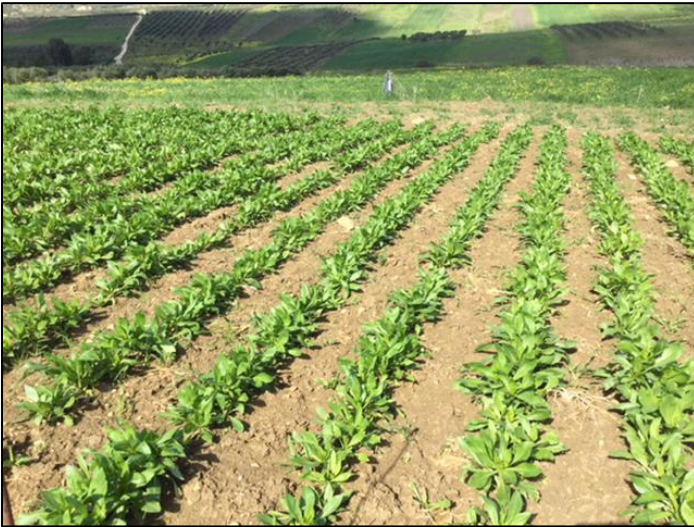

**Figure S1.** A view of safflower germplasm accessions experimental field.

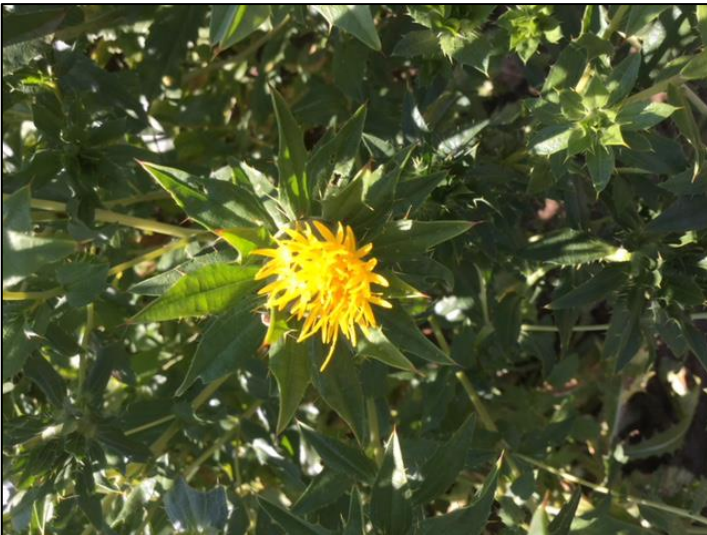

**Figure S2.** Safflower flowering stage.

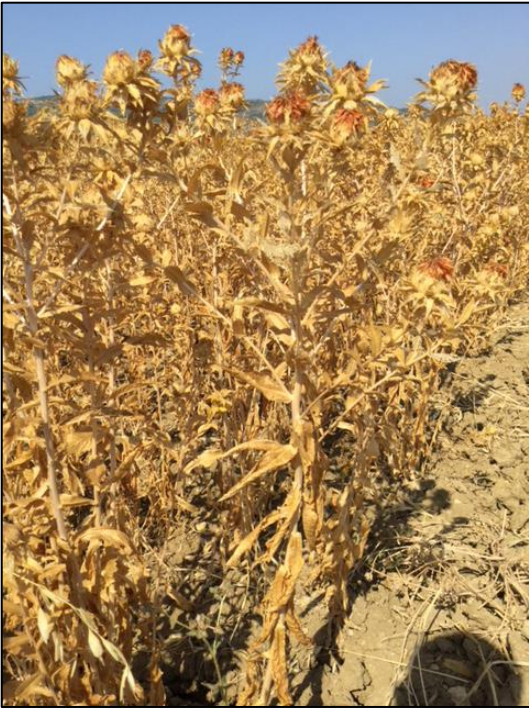

**Figure S3.** Safflower senescence stage and capitula browning.

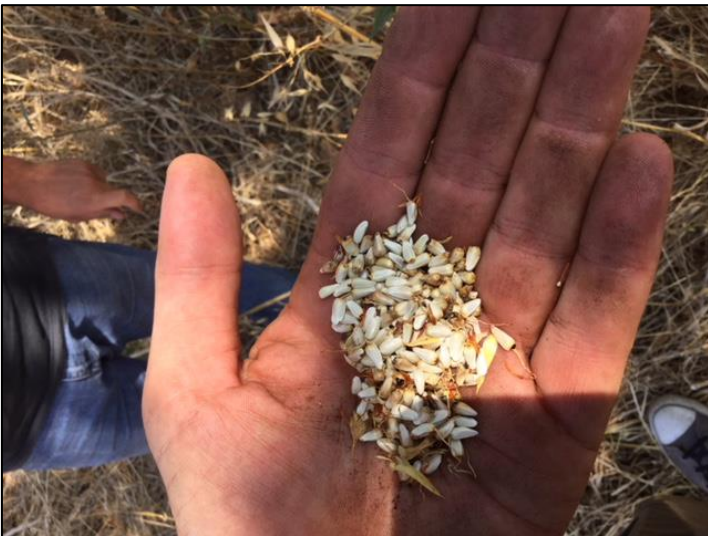

**Figure S4.** Safflower seeds.
